# Supplementary material for: Exoskeletons With Virtual Reality, Augmented Reality, and Gamification for Stroke Patients’ Rehabilitation: Systematic Review
Source: PubMed Central journal article supplement (PMC6779025; doi:10.2196/12010), 2019-09-08
Supplement: rehab_v6i2e12010_app1.pdf [file rehab_v6i2e12010_app1.pdf]

**Appendix A: Table 1**

| Article Name + Article Web Link   | Upper limb / or lower limb | Severity           | Assessment scale                  | Robotic / Exoskeleton Technology (Device) | DOF | Actuator type | Data source / Control input | Of-the-shelf (commercial) / OR Prototype & type model of device if commercial product | Exoskeleton Function / Wearable Exoskeleton placement | Clinical trial / or Home-based rehabilitation | Virtual reality / Augmented Rehabilitation Intervention ? Yes/No | Sample Size | Duration of Exoskeleton VR Rehabilitation program | Time of each VR - AR- GM task/session | Rehabilitation game difficulty level | Real-time feedback - Game                                                                                                                                                      | Feedback                                                                                                                                                                       | Results/improvements                                                                                                                                                                                                                                                                                                                                                               |
|-----------------------------------|----------------------------|--------------------|-----------------------------------|-------------------------------------------|-----|---------------|-----------------------------|---------------------------------------------------------------------------------------|-------------------------------------------------------|-----------------------------------------------|------------------------------------------------------------------|-------------|---------------------------------------------------|---------------------------------------|--------------------------------------|--------------------------------------------------------------------------------------------------------------------------------------------------------------------------------|--------------------------------------------------------------------------------------------------------------------------------------------------------------------------------|------------------------------------------------------------------------------------------------------------------------------------------------------------------------------------------------------------------------------------------------------------------------------------------------------------------------------------------------------------------------------------|
| (Lambercy et al., 2011)           | Upper limb                 | 597.5 ± 294.1 days | Fugl-Meyer Motor Assessment (FMA) | Haptic Knob (end-effect or device)        | 2   | Motor         | forearm and hand            | Commercial                                                                            | arm and hand function                                 | Clinical                                      | Games                                                            | 13          | 18 hours                                          | 60 minutes                            | Not mentioned                        | A score of the game was provided as a feedback to the patient, which was then used to adjust the difficulty level of the game.                                                 | Image and game are used during study in order to calculate score based on the timing and precision of the task                                                                 | Thirteen subjects successfully completed robot-assisted therapy, with significantly improved hand and arm motor functions (average 3.00 points increase on the FM and 4.55 on the MI). Also, it was concluded that as distal training in a functional way could benefit the whole arm so there would not be a need to do whole arm training in robot-assisted neurorehabilitation. |
| (Klamroth-Marganska et al., 2014) | Upper limb                 | 52 ± 44 (7 – 171)  | Fugl-Meyer Motor Assessment (FMA) | ARMin (in 3D workspace)                   | 7   | Motor         | Arm motor impairment        | Commercial                                                                            | Arm and Shoulder                                      | Clinical                                      | Virtual Reality (Games)                                          | 38          | 24 sessions                                       | 45 minutes                            | Adjusted by therapist                | Not mentioned                                                                                                                                                                  | Audio - Visual feedback was provided to patients to increase motivation                                                                                                        | Robotic training of the affected arm with ARMin was found to be more effective than conventional therapy in terms of motor function (FMA-UE: F = 4.1, p = 0.041, mean difference: 0.78 points, confidence interval [0.03 - 1.53]).                                                                                                                                                 |
| (Khor et al., 2017)               | Upper limb                 | 7.9 ± 6.6 months   | Fugl-Meyer Motor Assessment (FMA) | provided to b                             | 1   | 1 actuator    | forearm and wrist           | Commercial                                                                            | arm and hand function                                 | Clinical & Home                               | VR Game                                                          | 7           | 30                                                | 30min robot-assisted                  | Not mentioned                        | VR game provided during the robotic therapy have helped to engage users in a multi-sensory simulated environment that included real-time visual, auditory and tactile feedback | VR game provided during the robotic therapy have helped to engage users in a multi-sensory simulated environment that included real-time visual, auditory and tactile feedback | Improvement of active range of motion was detected in both pronation-supination (75.59%, p = 0.018) and wrist flexion-extension (56.12%, p = 0.018) after the training                                                                                                                                                                                                             |

|                       |            |                    |                                   |                                             |               |               |                                  |            |          |          |                 |                                 |                      |                            |                                                                                                                 |                                                                                                            |                                                                                                                                                                                 |                                                                                                                                                                                                                                                                                                          |
|-----------------------|------------|--------------------|-----------------------------------|---------------------------------------------|---------------|---------------|----------------------------------|------------|----------|----------|-----------------|---------------------------------|----------------------|----------------------------|-----------------------------------------------------------------------------------------------------------------|------------------------------------------------------------------------------------------------------------|---------------------------------------------------------------------------------------------------------------------------------------------------------------------------------|----------------------------------------------------------------------------------------------------------------------------------------------------------------------------------------------------------------------------------------------------------------------------------------------------------|
| (Acosta et al., 2011) | Upper limb | 2-15 years         | Fugl-Meyer Motor Assessment (FMA) | Arm Coordination Training 3D (ACT3D) system | 6             | Motor         | Shoulder                         | Commercial | Shoulder | Clinical | Video Game      | 7                               | 56                   | 3 minutes + 1 minutes rest | Difficulty level was based on the requirement for reaching movements of the game.                               | Game feedback was provided to the patient in the form of an avatar.                                        | Visual feedback on reaching performance through Air Hockey 3D game is given to impaired people/auditory feedback (buzzing noise) was also provided                              | Reaching distances achieved with the avatar feedback were greater on average than those achieved with Air Hockey 3D across conditions. Therefore results showed that video games and robotic systems that target specific impairments could be developed that would be useful for stroke rehabilitation. |
| (Wolf et al., 2015)   | Upper limb | less than 6 months | Fugl-Meyer Motor Assessment (FMA) | Hand Mentor Pro (HMP)                       | Not mentioned | Motor         | Hand                             | Commercial | Hand     | Home     | Video Game      | 47                              | 40 days (120 hours)  | 3 hrs/day                  | Same throughout the therapy and patients were given training                                                    | Not mentioned                                                                                              | HMP used a pneumatic artificial muscle to facilitate movement about the wrist and fingers while providing visual biofeedback about the quality and quantity of wrist movements. | Significant improvements were found in a group of patients showing an increase in ARAT scores and WMFT tasks.                                                                                                                                                                                            |
| (Ueki et al., 2012)   | Upper limb | Not provided       | Torque measurement device         | Hand Motion Assist Robot (Exoskeleton)      | 18            | Servo motor   | Hand (thumb and finger)          | Commercial | Hand     | Clinical | Virtual Reality | 6 healthy and 6 stroke patients | -                    | 20 min                     | Changed according to movable range                                                                              | Not mentioned                                                                                              | Scores are recorded, and the GUI showed the three scores (today, best, and last time) by status bars.                                                                           | The response of the motion assist mechanism showed that hand motion assisted robot has good-to-excellent properties and a high potential for providing hand rehabilitation therapy by self-motion control.                                                                                               |
| (Grimm et al., 2016)  | Upper limb | 8-156 months       | Fugl-Meyer Motor Assessment (FMA) | Arneo Spring                                | 7             | Not available | Shoulder, elbow and wrist joints | Commercial | Arm      | Clinical | Virtual Reality | 5                               | 4 weeks /20 sessions | 20                         | The level of difficulty for the exercise was adjusted by a performance-dependent real-time adaptation algorithm | Feedback as to the movement quality, i.e., the absence or presence of compensatory movements was provided. | The subjects received brain self-regulation and proprioceptive feedback and closed-loop virtual reality feedback from their three-dimensional movements.                        | There was an improvement of kinematic parameters and therefore was significant motor improvements in grip force and elbow movement.                                                                                                                                                                      |



|                            |            |                           |                                                                                  |                            |               |                                       |                    |            |       |          |                 |    |                            |                 |                                                                     |                                                                                                                                   |                                                                                                                  |                                                                                                                                                                                                                                           |
|----------------------------|------------|---------------------------|----------------------------------------------------------------------------------|----------------------------|---------------|---------------------------------------|--------------------|------------|-------|----------|-----------------|----|----------------------------|-----------------|---------------------------------------------------------------------|-----------------------------------------------------------------------------------------------------------------------------------|------------------------------------------------------------------------------------------------------------------|-------------------------------------------------------------------------------------------------------------------------------------------------------------------------------------------------------------------------------------------|
| (Delbressine et al., 2012) | Upper limb | -                         | Not mentioned                                                                    | Sensor Jacket              | Not mentioned | -                                     | Chest and Shoulder | Prototype  | Chest | Clinical | Games           | 12 | NA                         | 40 minutes      | Difficulty level was changing as per participants.                  | Real time is provided through a graphical representation consisting of two bars, one for the shoulder and one for trunk movement. | Vibrotactile feedback is provided on the corresponding body part on a graphical interface.                       | Need more improvement in choosing the right game for patients.                                                                                                                                                                            |
| (Gijbels et al., 2011)     | Upper limb | 27 ± 10 years             | TEMPEA                                                                           | Armeo Spring               | 5             | Non robotic actuator / Passive system | Arm                | Commercial | Arm   | Clinical | Virtual Reality | 10 | 8 weeks / 3 times per week | 30 minutes      | Not applicable                                                      | Not applicable                                                                                                                    | Auditory and visual performance feedback during and after practice                                               | TEMPEA scores improved (p = 0.02), while a trend towards significance was found for the 9HPT (p = 0.05)                                                                                                                                   |
| (House et al., 2016)       | Upper limb | Average of 98 (45) months | Fugl-Meyer Motor Assessment (FMA)                                                | Bright Arm Duo Arm Support | Not mentioned | Electrical actuators                  | Arm                | Commercial | Arm   | Clinical | Games           | 7  | 8 weeks                    | 20 min - 50 min | Games                                                               | Nine games included summative performance feedback which provided positive reinforcement and were meant as morale boosters.       | Feedback of the table current status was made available to the therapist at the laptop station or output display | The most significant improvement was in grasp strength of the affected arm from an average of 7.6 N pretherapy to 17.2 N post-therapy                                                                                                     |
| (Buschfort et al., 2010)   | Upper limb | 4.3 weeks                 | Fugl-Meyer-Assessment and Action Research Arm Test                               | Arm studio                 | Not mentioned | Not available                         | Arm                | Commercial | Arm   | Clinical | Games           | 24 | 3 weeks / 15 sessions      | 30-45 min       | Games                                                               | Not mentioned                                                                                                                     | Computer biofeedback, via a wireless mouse connected to the combining rod, is optional.                          | The arm studio provides high-intensity impairment oriented training may have great potential for the rehabilitation of the upper limb of severely affected patients after stroke in terms of cost effectiveness and customizable effects. |
| (Cameira o et al., 2012)   | Upper limb | 133.4 ± 297 days          | Barthel Index, Motricity Index22, Modified Ashworth Scale, Fugl-Meyer Assessment | RGS-Haptic (RGS-H)         | 6             | Not available                         | Arm                | Prototype  | Arm   | Clinical | Virtual Reality | 14 | 5 weeks (4 days a week)    | 35 min          | Difficulty level was updated online by a psychometrically validated | Not applicable                                                                                                                    | Visual feedback was presented during movement                                                                    | Improvements were assessed more in patients allocated to the RGS-H group (average rating of 3.7 against 2.8 for RGS and 2.9 for RGS-E).                                                                                                   |

|                                  |            |                                         |                                                                                                  |               |               |               |      |               |      |          |                 |    |                                      |                      |                                                                                            |                                                       |                                                                                                                        |                                                                                                                                                                                                            |
|----------------------------------|------------|-----------------------------------------|--------------------------------------------------------------------------------------------------|---------------|---------------|---------------|------|---------------|------|----------|-----------------|----|--------------------------------------|----------------------|--------------------------------------------------------------------------------------------|-------------------------------------------------------|------------------------------------------------------------------------------------------------------------------------|------------------------------------------------------------------------------------------------------------------------------------------------------------------------------------------------------------|
|                                  |            |                                         | ent, Chedoke Arm and Hand Activity Inventory (CAHAI), Nine Hole Peg Test and Box and Block Test. |               |               |               |      |               |      |          |                 |    |                                      |                      | ed adaptive controller, or Personalized Training Module                                    |                                                       |                                                                                                                        |                                                                                                                                                                                                            |
| (da Silva Cameirão et al., 2011) | Upper limb | 3 weeks                                 | Fugl-Meyer Motor Assessment (FMA)                                                                | Data Gloves   | Not mentioned | Not available | Hand | Prototype     | Hand | Clinical | Virtual Reality | 8  | 12 weeks                             | 20 min               | New difficulty setting was computed taking into account the previous responses of the user | Not applicable                                        | Sensory feedback of one's actions in terms of movement patterns and movement outcomes was provided.                    | Rehabilitation Gaming System speeds-up the recovery of the deficits of the upper extremities, with particular emphasis on functional aspects related to the performance of the activities of daily living. |
| (Liao et al., 2012)              | Upper limb | 23.90 ± 13.39 months                    | Fugl-Meyer Motor Assessment (FMA)                                                                | Bi-Manu-Track | Not mentioned | Not available | Arm  | Not mentioned | Arm  | Clinical | Games           | 10 | 20 sessions/ 4 weeks (5 days a week) | 90-105 minutes a day | Not mentioned                                                                              | Real-time visual feedback about the actions or force. | Variety of variety of sensorimotor feedback such as visual and auditory feedback during training sessions is provided. | The robot-assisted therapy group handled more daily tasks with the impaired arm than the control group. Also motor function was greatly improved.                                                          |
| (Hsieh et al., 2011)             | Upper limb | 21.33 (7.17) months for Group 1 and 13. | Fugl-Meyer Motor Assessment (FMA)                                                                | Bi-Manu-Track | Not mentioned | Not available | Arm  | Not mentioned | Arm  | Clinical | Games           | 6  | 4 weeks (5 days a week)              | 90-105 min/d,        | Not mentioned                                                                              | Visual movement feedback was provided from the game   | The therapist also provided the verbal feedback with the visual feedback from the game.                                | Post hoc analyses revealed that the higher intensity RT group showed significantly better improvements in motor ability than the lower intensity RT group (P = .04)                                        |

|                        |            |                       |                                                                                                                                                       |                                                                        |   |                   |      |            |                  |          |                         |    |                          |                                |                                                         |                |                                                                                                    |                                                                                                                                                                    |
|------------------------|------------|-----------------------|-------------------------------------------------------------------------------------------------------------------------------------------------------|------------------------------------------------------------------------|---|-------------------|------|------------|------------------|----------|-------------------------|----|--------------------------|--------------------------------|---------------------------------------------------------|----------------|----------------------------------------------------------------------------------------------------|--------------------------------------------------------------------------------------------------------------------------------------------------------------------|
|                        |            | 00 (7.04) for Group 2 |                                                                                                                                                       |                                                                        |   |                   |      |            |                  |          |                         |    |                          |                                |                                                         |                |                                                                                                    |                                                                                                                                                                    |
| (Zhang et al., 2011)   | Upper limb | -                     | Wolf Motor Function Test (WMFT) and Fugl Meyer Assessment (FMA).                                                                                      | RUPERT                                                                 | 5 | Pneumatic (PAMs)  | Arm  | Commercial | Arm and Shoulder | Home     | Virtual Reality         | 2  | once/weekday for 4 weeks | 45                             | Changed by therapist.                                   | Not applicable | -                                                                                                  | Out of 2 patients, 1 showed improvements in movement smoothness on targets whereas second patient did not experience ascending nor descending trend in smoothness. |
| (Frisoli et al., 2012) | Upper limb | Between 3 and 9 years | Fugl-Meyer Assessment scale and Modified Ashworth scale                                                                                               | L-Exos                                                                 | 4 | Electric motors   | Arm  | Commercial | Arm              | Clinical | Virtual Reality         | 9  | 18 sessions/6 weeks      | 60 minutes                     | Not applicable                                          | Not applicable | -                                                                                                  | There was an improvement of the motor performance and the reduction of the muscular spasticity.                                                                    |
| (Mihelj et al., 2012)  | Upper limb | 128 ± 64 days         | -                                                                                                                                                     | Haptic Master robot                                                    | 3 | DC brushed motors | Arm  | Commercial | Arm              | Clinical | Virtual Reality (Games) | 16 | Twice a week/2 weeks     | Minimum 5 minutes              | Adjusted by therapist                                   | Not applicable | Visual and Acoustic feedback is provided.                                                          | Helps in increasing motivation of patients in rehabilitation process.                                                                                              |
| (Sivan et al., 2014)   | Upper limb | 24.8 (17.8) months    | Optotrak kinematic variables, Fugl Meyer Upper Limb Extremity motor subscale (FM-UE), Action Research Arm Test (ARAT), Medical Research Council (MRC) | Home-based Computer Assisted Arm Rehabilitation (hCAAR) robotic device | - | -                 | Hand | -          | Hand             | Home     | Games                   | 17 | 8 weeks                  | Mean device usage time 520 min | Level was changing as per the extent of workspace used. | Not mentioned  | Visual and auditory feedback of the target location and the movement of the joystick was provided. | The percentage improvement in the median movement time at A1 was by 19%, path length improved by 15% and jerk improved by 19%                                      |

|                                |            |                         |                                                                                                 |                          |                 |                   |                         |               |         |          |       |    |                                 |                 |                                                                                                                |                                                                                |                                                        |                                                                                                                                                                                                                                |
|--------------------------------|------------|-------------------------|-------------------------------------------------------------------------------------------------|--------------------------|-----------------|-------------------|-------------------------|---------------|---------|----------|-------|----|---------------------------------|-----------------|----------------------------------------------------------------------------------------------------------------|--------------------------------------------------------------------------------|--------------------------------------------------------|--------------------------------------------------------------------------------------------------------------------------------------------------------------------------------------------------------------------------------|
|                                |            |                         | and Modified Ashworth Scale (MAS), Chedoke Arm and Hand Activity Inventory (CAHAI) and ABILHAND |                          |                 |                   |                         |               |         |          |       |    |                                 |                 |                                                                                                                |                                                                                |                                                        |                                                                                                                                                                                                                                |
| (Amirabdollahian et al., 2014) | Upper limb | 11 months (± 6 months). | Fugl-Meyer Motor Assessment (FMA)                                                               | SCRIPT Prototype 1 (SP1) | -               | -                 | Hand (thumb and finger) | Prototype     | Hand    | Home     | Games | 12 | 6 Weeks                         | 30 min per day, | Game difficulty increases when lateral movement of the arm are added to the flexion. and extension of the hand | Not mentioned                                                                  | (Bio) feedback is provided about patient's performance | The study showed the feasibility of independent home-based training with the SCRIPT system.                                                                                                                                    |
| (Stein et al., 2011)           | Upper limb | > 6 months              | Fugl-Meyer Motor Assessment (FMA)                                                               | Amadeo                   | -               | Not mentioned     | Fingers and Hand        | -             | Hand    | Clinical | Games | 12 | 6 Weeks /3 days per week        | 1 hour          | Changed as per user.                                                                                           | Visual feedback was provided using two games.                                  | Not mentioned                                          | Improvements were found in multiple measures of motor performance, including the Upper Extremity Fugl-Meyer, the Motor Activity Log, the Manual Ability Measure-36, and the Jebsen Hand Function Test.                         |
| (Dovat et al., 2010)           | Upper limb | 2 years to 6 years      | Fugl-Meyer Motor Assessment (FMA)                                                               | HandCARE                 | Robotics device | DC brushed motors | Hand and Fingers        | Not mentioned | Fingers | Clinical | Games | 2  | 8 weeks (two sessions per week) | 20 min          | Not mentioned                                                                                                  | Games were based on visual feedback and provided virtual reality environments. | Used multi-sensory feedback to increase motivation.    | There was a noticeable improvement in the Chedocke-McMaster impairment inventory which illustrated the potential of the HandCARE exercises and validated the use of the proposed metrics to evaluate hand and finger function. |

|                        |            |                     |                                           |                |               |   |       |               |                 |          |                         |                              |                                  |                    |                                                                                                          |                                                            |                                                                                                                                                                                                        |                                                                                                                                                                                                  |
|------------------------|------------|---------------------|-------------------------------------------|----------------|---------------|---|-------|---------------|-----------------|----------|-------------------------|------------------------------|----------------------------------|--------------------|----------------------------------------------------------------------------------------------------------|------------------------------------------------------------|--------------------------------------------------------------------------------------------------------------------------------------------------------------------------------------------------------|--------------------------------------------------------------------------------------------------------------------------------------------------------------------------------------------------|
| (Novak et al., 2014)   | Upper limb | 2 years to 21 years | Fugl-Meyer Motor Assessment (FMA)         | ARMin IV       | 7             | - | Arm   | Commercial    | Arm and forearm | Clinical | Games                   | 30 unimpaired and 8 impaired | Once                             | Three 5-min rounds | Game difficulty was varied during the practice round and finally set at a level appropriate for subjects | -                                                          | Feedback was taken from participants using questionnaires.                                                                                                                                             | Study showed that stroke patients prefer playing two-player rehabilitation game as compared to single-player one, as they enjoy being able to talk and otherwise interact with the other person. |
| (Merians et al., 2010) | Upper limb | 6 (5) years         | Fugl-Meyer Motor Assessment (FMA)         | Cyber Glove    | -             | - | Hand  | Commercial    | Hand            | Clinical | Virtual Reality (Games) | 11                           | 2 weeks                          | 2-3 Hour/session   | Not mentioned                                                                                            | Visual and auditory feedback                               | Limb control was effective and there were robust changes in functional tests of upper extremity motor control, the Wolf Motor Function Test, the Jebsen Test of Hand Function and the 9-hole Peg Test. |                                                                                                                                                                                                  |
| (Kan et al., 2011)     | Upper limb | 227 days            | Chedoke-McMaster Stroke Assessment (CMSA) | Robotic device | -             | - | Trunk | Not mentioned | -               | Clinical | Virtual Reality         | 1                            | Three times a week for two weeks | Not applicable     | Visual feedback on hand position and target location                                                     | Feedback was taken from participants using questionnaires. | POMDPs (a partially observable Markov decision process) have promising potential to provide autonomous upper-limb rehabilitation for stroke patients.                                                  |                                                                                                                                                                                                  |
| (Simkins et al., 2012) | Upper limb | > 6 months          | Chedoke-McMaster Stroke Assessment (CMSA) | EXO            | Not mentioned | - | Arm   | Commercial    | Arm             | Clinical | Games                   | 10                           | 12 sessions                      | 90 min             | -                                                                                                        | Not mentioned                                              | Feedback was taken from participants using questionnaires.                                                                                                                                             | Subjects preferred static games to dynamic games when attending sessions for post-rehabilitation with the help of an exoskeleton.                                                                |
